1 The exploration of the characteristics of lower extremity deep  
2 venous thromboembolism in patients at admission to a tertiary  
3 general hospital in a fourth-tier city in China

4

5 Jianghao Pan<sup>1\*</sup>, Jianming Sun<sup>2</sup>, Jiaming Song<sup>3</sup>, Guangyin Fu<sup>1</sup>, Yong Lei<sup>2</sup>, Le Wang<sup>4\*</sup>

6 1. Department of Interventional Radiology, Hengshui People's Hospital, Hebei

7 Province, China. 2 Department of Vascular Surgery, Hengshui People's Hospital, Hebei

8 Province, China. 3 Emergency Department, Hengshui People's Hospital, Hebei

9 Province, China. 4 Department of Clinical Medicine Administration, Ascentage

10 Pharma Group Inc, Jiangsu Province, China.

11 [\\*le.wang@ascentage.com](mailto:le.wang@ascentage.com) (LW)

12

13 **Abstract**

14 With the acceleration of the pace of life and the change of people's living and working

15 habits, the incidence of venous diseases of lower extremity remains high, and even

16 shows an upward trend year by year, which has a great impact on the quality of life and

17 work efficiency of patients. Well, the occurrence and development of lower extremity

18 deep vein thrombosis (LEDVT) is also related to the economic and humanistic

19 characteristics of a certain place.

20 *Objectives*

21 The purpose of this paper is to retrospectively analyze the medical records of DVT

22 patients in a general hospital of a fourth-tier city in China, and find some noteworthy

NOTE: This preprint reports new research that has not been certified by peer review and should not be used to guide clinical practice.

23 characteristics, so as to provide some objective evidence for the diagnosis of DVT in  
24 similar hospitals.

#### 25 *Methods*

26 Adult patients with central LEDVT with or without pulmonary embolism (PE) were  
27 retrospectively analyzed. The general condition, concomitant diseases, laboratory tests  
28 and other clinical characteristics were analyzed.

#### 29 *Results*

30 A total of 100 patients' medical records were analyzed. The age was non-normally  
31 distributed ( $p = 0.004$ ), which from 31 to 87 ( $65.3 \pm 11.5$ ) years, and 58% of them were  
32 65 years or older. Males (56%) were slightly more than females. Ninety of ninety-four  
33 patients' D-dimer  $\geq 1\mu\text{gDDU/ml}$ . Fifty-eight were definitely diagnosed with central  
34 LEDVT at admission, of which twenty-three were confirmed as PE by CT. Thirty-five  
35 patients with leg symptoms, thirty-three patients with chest symptoms, only two  
36 patients had both leg and chest symptoms, and thirty-four patients without any obvious  
37 symptoms of DVT when they were admitted to the hospital. Only twelve patients were  
38 admitted only with LEDVT, and most of the other patients were complicated with other  
39 system/organ diseases.

#### 40 *Conclusions*

41 LEDVT is more common in elderly patients aged  $\geq 65$  years. However, the incidence  
42 of patients  $\geq 75$  years old observed in this study may be limited by the local economic  
43 situation and life expectancy. The symptoms can present as many, may be the typical  
44 leg symptoms, progression to PE may involve chest symptoms, or it may be neither leg

45 symptoms nor chest symptoms that are masked by the symptoms of other concomitant  
46 diseases. LEDVT can be complicated with multiple system/organ diseases. It is  
47 necessary to screen for DVT in patients with abnormal D-dimer.

48

## 49 **Introduction**

50 Venous thromboembolism (VT) includes DVT and pulmonary embolism (PE). DVT  
51 most often occurs in the leg vein but can also develop in the splanchnic, cerebral, and  
52 arm veins. The annual incidence of DVT of the leg is between 48 and 182 per 100,000  
53 in the population[1]. It is the most worrisome of the aetiologies of acute leg swelling  
54 and prompt diagnosis and management is essential to minimize the risk of PE and post  
55 thrombotic syndrome (PTS). The PTS is a spectrum of signs and symptoms of chronic  
56 venous insufficiency, which ranges from mild ankle swelling to debilitating venous  
57 claudication or leg ulcers[2]. DVT is a common cause of morbidity and mortality and  
58 the third most common cardiovascular disease, after myocardial infarction and stroke.  
59 Afflicting worldwide nearly 10 million people of all ethnicities per year, VT is a  
60 substantial contributor to the global burden of disease[3]. The annual incidence of acute  
61 VT is 1–2 cases per 1000 population[3-5], which rises exponentially with age for both  
62 men and women, and is 4-times higher in high-income than low-income countries[6].  
63 The diagnosis of DVT of the leg can be difficult with clinical findings and history being  
64 unreliable, though there are so many guidelines on the detection and subsequent  
65 management of DVT and suggests the incorporation of a clinical prediction score  
66 (Wells score), D-dimer test and venous duplex ultrasound.

67 Therefore, we hope to further explore the etiology of venous thrombosis of lower  
68 extremitys by retrospectively comprehensively analyzing the basic characteristics,  
69 disease characteristics, complications and other factors of inpatients with LEDVT in a  
70 fourth-tier city, that economic and demographic factors are at the middle level in China,  
71 expecting to provide reference information for the future diagnosis and treatment of  
72 hospitals at the same level.

73

#### 74 **Methods**

75 This study was part of the project "The analysis of the treatment strategy and safety of  
76 acute lower extremity deep venous thrombosis" (Medical Science Research Project of  
77 Hebei Province, No. 20220459) which was reviewed and approved by the Ethics  
78 Committee of Hengshui People's Hospital, Hebei Province, China (Approval No.:  
79 2021-3-009-1). This part is only a retrospective observation of hospitalized patients,  
80 and does not involve disclosure of patients' personal information and treatment  
81 strategies, which are anonymous information. In this part, only the medical records  
82 retrieved according to the key words were analyzed. No minors were involved. Personal  
83 patient information was anonymized. Therefore, no remedial informed consent was  
84 obtained.

#### 85 *Study Design and Participation*

86 This was a single-center observational study of medical records conducted in a fourth-  
87 tier city in China.

#### 88 *Included and Excluded Criterion*

89 Inclusion criteria: a) age  $\geq 18$  years, b) patients with an objectively diagnosed, proven  
90 episode the central type of LEDVT, including total femoral vein thrombosis and iliac  
91 vein thrombosis or a pulmonary embolism (PE) were included, c) hospital stay  $> 48$  h,  
92 d) availability of results ultrasonography, e) all patients were diagnosed with DVT for  
93 the first time. Exclusion criteria: serious medical problems without tolerating any  
94 treatment. No patients were excluded owing to the use of anticoagulation drugs.

95

#### 96 *Data Collection and Definitions*

97 Data were collected from January 1 to December 31, 2023. General information,  
98 including each patient's age, gender, the chief complaints, previous medical history,  
99 and associated diseases of the enrolled patients were retrospectively retrieved, and the  
100 laboratory tests and examination results of the patients in the outpatient clinic,  
101 emergency department or after admission were collected.

102 The results of laboratory tests, which measured the prothrombin time (PT), activated  
103 partial thrombin time (APTT), platelet count, fibrinogen (FIB), fibrinogen degradation  
104 products (FDP), international normalized ratio (INR), concentrations of plasma D-  
105 dimer (Latex immunoturbidimetric was used, LETIA), and blood lipids, were recorded.

106 All laboratory examination results were obtained from Hengshui People's Hospital,  
107 Hebei Province, China, and the results were interpreted according to the reference range  
108 set by the laboratory equipment of the hospital. Admission diagnoses were classified  
109 according to ICD-11[7].

110 We used Doppler ultrasonography to diagnose the VT. The diagnostic criteria was the

111 presence of a constant intraluminal filling defect in femoral and iliac veins for central  
112 DVT, as well as spiral computer tomography and pulmonary angiography for diagnosis  
113 of PE.

114 Symptoms were categorized into three categories as described by the patients: swelling  
115 and/or pain in the lower extremity was considered leg symptoms; the presence of chest  
116 tightness and/or chest pain was considered chest symptoms, and others were unrelated  
117 symptoms.

118

### 119 *Statistics Analysis*

120 Data were analyzed between Jan and Mar 2024. Statistical analysis was performed  
121 using the SPSS Version 19.0 (SPSS Inc., Chicago, Illinois, USA).

122 A descriptive statistical analysis was carried out between the general data and current  
123 survey results, including the rate, percentage, mean, and standard deviation. The  
124 measurement data were analyzed to determine if the data were normally distributed.

125

## 126 **Result**

### 127 *Patients' Characteristics*

128 According to the inclusion criteria, a total of 100 patients' medical records were  
129 screened for analysis. The age from 31 to 87 ( $65.3 \pm 11.5$ ) years, and 74% of the patients  
130 were 60 years or older, 58% were 65 years or older, and 39% were 70 years or older.

131 The Kolmogorov-Smirnov test showed that the age was non-normally distributed ( $p$   
132  $=0.004$ ), the 65 to 75 age groups accounted for 46% (Fig 1). There were slightly more

133 males (56%) than females (Table 1).

134

135 **Fig 1. Histogram of all patients according to age distribution**

136

137 **Table 1. Overview of the clinical characteristics of the patients**

|                                    | N   | Mean $\pm$ SD      |
|------------------------------------|-----|--------------------|
| Gender                             | 100 | -                  |
| Male (n)                           | 56  | -                  |
| Female (n)                         | 44  | -                  |
| Age (years)                        | 100 | 65.30 $\pm$ 11.50  |
| $\geq 65$                          | 58  | -                  |
| $< 65$                             | 42  | -                  |
| Temperature ( $^{\circ}$ C)        | 100 | 36.76 $\pm$ 2.61   |
| Pluse rate (times/minute)          | 100 | 88.05 $\pm$ 19.18  |
| $\geq 100$                         | 24  | -                  |
| Respiratory rate (times/minute)    | 100 | 19.45 $\pm$ 2.68   |
| SBP (mmHg)                         | 100 | 130.19 $\pm$ 22.55 |
| $\geq 120$                         | 76  | -                  |
| DBP (mmHg)                         | 100 | 79.71 $\pm$ 15.07  |
| $\geq 90$                          | 24  | -                  |
| Blood platelet ( $\times 10^9/L$ ) | 99  | 208.83 $\pm$ 93.67 |

|                                                      |     |                     |
|------------------------------------------------------|-----|---------------------|
| $\geq 300$                                           | 13  | -                   |
| Blood glucose (mmol/L)                               | 94  | 8.49 $\pm$ 5.00     |
| $\geq 6.1$                                           | 56  | -                   |
| Triglyceride (TG, mmol/L)                            | 72  | 1.61 $\pm$ 2.02     |
| $\geq 1.7$                                           | 17  | -                   |
| Total cholesterol (TC, mmol/L)                       | 72  | 4.43 $\pm$ 1.30     |
| $\geq 5.7$                                           | 9   | -                   |
| Serum creatinine (umol/L)                            | 100 | 87.12 $\pm$ 85.58   |
| $\geq 81$                                            | 36  | -                   |
| Blood uric acid (umol/L)                             | 100 | 336.66 $\pm$ 138.85 |
| $\geq 363$                                           | 34  | -                   |
| D-dimer ( $\mu$ gDDU/ml)                             | 94  | 9.72 $\pm$ 14.19    |
| $\geq 1$                                             | 90  | -                   |
| Prothrombin time (PT, second)                        | 98  | 11.88 $\pm$ 1.52    |
| 9~13                                                 | 89  | -                   |
| $\geq 13$                                            | 9   | -                   |
| Activated partial thromboplastin time (APTT, second) | 98  | 27.32 $\pm$ 7.93    |
| $\leq 25$                                            | 29  | -                   |
| 25~31.3                                              | 59  | -                   |
| $\geq 31.3$                                          | 10  | -                   |
| Fibrinogen (FIB, g/L)                                | 97  | 3.60 $\pm$ 1.63     |
| $\leq 2$                                             | 13  | -                   |



|                                              |     |             |
|----------------------------------------------|-----|-------------|
| 2~4                                          | 52  | -           |
| ≥4                                           | 32  | -           |
| Fibrinogen degradation products (FDP, μg/ml) | 78  | 33.93±51.99 |
| ≥5                                           | 66  |             |
| International normalized ratio (INR)         | 75  | 1.1584±1.09 |
| ≤0.8                                         | 1   | -           |
| 0.8~1.2                                      | 67  | -           |
| ≥1.2                                         | 7   | -           |
| Pulmonary embolism ( n )                     | 100 | -           |
| Confirmed PE by CT ( n )                     | 23  | -           |
| uncheck ( n )                                | 77  | -           |
| Complaint                                    | 102 | -           |
| Unrelated symptoms ( n )                     | 34  | -           |
| leg symptoms ( n )                           | 35  | -           |
| Chest symptoms ( n )                         | 33  | -           |

138

139 Twenty-four patients had a resting heart rate of more than 100 beats per minute.

140 Seventy-six patients had SBP ≥120mmHg and twenty-four had DBP ≥ 90mmHg. There

141 were fifty-six patients with fasting blood glucose higher than 6.1mmol/L, thirty-six

142 patients with serum creatinine and thirty-four patients with uric acid higher than the

143 upper limit of our hospital detection standard. Triglyceride and total cholesterol were

144 higher than the upper limit of our hospital detection standard in seventeen cases and

145 nine patients, respectively. Ninety of ninety-four patients' D-dimer had abnormal  
146 results ( $\geq 1\mu\text{gDDU/ml}$ ). Most of the other coagulation-related indexes (including  
147 platelet count) were in the normal range (Table 1).

148 Although all the enrolled patients had central LEDVT, at the time of admission, forty-  
149 two had been admitted because of other medical conditions or discomfort, and only  
150 fifty-eight were diagnosed with LEDVT, of which twenty-three were confirmed as PE  
151 by CT. Thirty-four patients did not have any obvious symptoms of DVT at admission.  
152 Thirty-five patients were admitted to the hospital with the chief complaint of leg  
153 symptoms. Thirty-three patients were admitted with chest symptoms as the chief  
154 complaint. Only 2 patients had both leg and chest symptoms (Table 1 and Table 2).

155

156 **Table 2. Distribution of symptoms and age  $\geq 65$  years among system diseases at**  
157 **admission**

| Classification of Diseases                                            | Number | Age $\geq 65$ | unrelated | leg      | chest    |
|-----------------------------------------------------------------------|--------|---------------|-----------|----------|----------|
|                                                                       |        | years         | symptoms  | symptoms | symptoms |
|                                                                       |        | (n)           | (n)       | (n)      | (n)      |
| LEDVT at admission                                                    | 58     | 35            | 8         | 31       | 19       |
| Confirmed PE by CT                                                    | 23     | -             | 1         | 1        | 21       |
| Hypertensive diseases                                                 | 51     | 29            | 18        | 12       | 21       |
| Injury, poisoning or certain other<br>consequences of external causes | 33     | 22            | 15        | 8        | 10       |

|                                                                  |    |    |    |   |    |
|------------------------------------------------------------------|----|----|----|---|----|
| Other diseases of the circulatory system                         | 31 | 21 | 7  | 8 | 16 |
| Endocrine, nutritional or metabolic diseases (Diabetes mellitus) | 31 | 16 | 10 | 9 | 12 |
| Diseases of the respiratory system                               | 28 | 14 | 15 | 7 | 6  |
| Cerebrovascular diseases                                         | 26 | 17 | 11 | 5 | 10 |
| Neoplasms                                                        | 18 | 12 | 9  | 6 | 3  |
| Diseases of the digestive system                                 | 18 | 12 | 12 | 3 | 3  |
| Symptoms, signs or clinical findings, not elsewhere classified   | 15 | 9  | 6  | 4 | 5  |
| Diseases of the nervous system                                   | 12 | 7  | 9  | 2 | 1  |
| Diseases of the musculoskeletal system or connective tissue      | 10 | 7  | 2  | 3 | 5  |
| Diseases of the genitourinary system                             | 5  | 2  | 3  | 1 | 1  |
| Certain infectious or parasitic diseases                         | 3  | 2  | 1  | 1 | 1  |
| Diseases of the blood or blood-forming organs                    | 1  | 0  | 1  | 0 | 0  |
| Mental, behavioural or neurodevelopmental disorders              | 1  | 1  | 1  | 0 | 0  |

158

159 Two patients were diagnosed with coronary artery disease at admission because of chest  
 160 tightness and pain. Further examination after admission confirmed DVT of the lower  
 161 extremities and PE. Seven of the twenty-three patients with PE diagnosed by CT had a

162 pulse rate  $\geq 100$  beats/min at admission.

163 Among the 100 patients, twelve patients had no other systemic diseases, fifty-one  
164 patients had hypertensive disease, thirty-three patients had injury, poisoning or certain  
165 other consequences of external causes, thirty-one had diabetes mellitus, thirty-one had  
166 other diseases of the circulatory system (excluding VT and hypertension), twenty-eight  
167 had disease of respiratory system, twenty-six had cerebrovascular diseases, eighteen  
168 had neoplasms (including cysts and polyps), eighteen had diseases of the digestive  
169 system, twelve had diseases of the nervous system (excluding cerebrovascular diseases),  
170 ten had diseases of the musculoskeletal system or connective tissue, and five had  
171 diseases of the genitourinary system (Table 2).

172 Among the fifty-eight patients who were diagnosed with LEDVT at admission, thirty-  
173 five patients were  $\geq 65$  years old, thirty-one patients had leg symptoms, nineteen  
174 patients had symptoms of chest symptoms, and eight patients had no DVT related  
175 symptoms. Twenty-one patients were diagnosed with PE by CT examination because  
176 of chest symptoms. Among the patients who were clearly diagnosed with LEDVT at  
177 admission, the elderly patients aged  $\geq 65$  years accounted for the majority of the  
178 concomitant diseases in each system. Patients with hypertensive disease, other diseases  
179 of the circulatory system and diabetes mellitus had relatively more chest symptoms,  
180 which were twenty-one, sixteen and twelve cases, respectively. Most of the patients  
181 with other system diseases combined with LEDVT had no related symptoms at  
182 admission (Table 2).

183 It is worth mentioning that one female patient died on the sixth day of admission. The

184 patient was hospitalized with cerebral thrombosis due to poor movement of the left  
185 extremity for 2 days. After admission, ultrasound examination showed heterogeneous  
186 echo and filling defects in the left common femoral vein, femoral vein, deep femoral  
187 vein, popliteal vein, posterior tibial vein, and peroneal vein. Before death, she suddenly  
188 developed vertigo, palpitations, and chest tightness while lying down in a sitting  
189 position. At the same time, the SPO<sub>2</sub> decreased to 84%, and the blood pressure was  
190 91/52 mmHg. After 2.5 hours of rescue, there was no relief of symptoms. Blood  
191 pressure and SPO<sub>2</sub> continued to decrease until there was no spontaneous rhythm and  
192 respiration, and blood pressure could not be measured. The patient was declared  
193 clinically dead.

194

## 195 **Discussion**

196 Although there have been many studies on the causes, influencing factors and  
197 diagnostic methods of LEDVT, few papers have summarized the characteristics of  
198 patients with LEDVT at admission involving the same level of cities and hospitals.

199 In this study, most of the patients diagnosed with LEDVT at admission or during  
200 hospitalization were elderly. This is consistent with previous studies. As we know the  
201 risk of VT increases with age[8]; 60% of all events occur after the age of 60 years. The  
202 incidence of VT is less than 5 per 100 000 individuals per year in people younger than  
203 15 years but is approximately 500 patients per 100 000 individuals per year at the age  
204 of 80 years[9]. The main age group of patients in this study was between 65 to 75 years  
205 old. Although there appears to be a trend toward an increase in LEDVT with age up to

206 75 years, there is not a continuous increase in patients after age 75 years. Taking into  
207 account the local health economic situation, the average life expectancy of residents is  
208 related.

209 Similar to many previous studies, although the patients in this study were all patients  
210 with LEDVT, only one third of the patients had typical LEDVT related leg symptoms,  
211 and one third of the patients had chest symptoms at admission. As we know the typical  
212 clinical signs and symptoms of LEDVT include leg pain (80–90% of patients), swelling  
213 (80%), redness (25%), localised tenderness on palpation (75–85%), and prominent  
214 collateral superficial veins (30%)[10, 11]. Of the fifty-eight patients with LEDVT  
215 diagnosed at admission, thirty-one had definite leg symptoms. Chest symptoms maybe  
216 the most obvious and easily recognized symptoms associated with PE. In this study,  
217 twenty-one of the twenty-three patients who were diagnosed with PE by CT scan were  
218 diagnosed with PE because they had obvious chest symptoms. Take a look at past  
219 reports that most patients with PE present with breathlessness (80% of patients),  
220 pleuritic chest pain (60–70%), haemoptysis (5–13%), tachycardia (65–70%), or  
221 hypoxemia (70%), but can also present with severe haemodynamic compromise (10–  
222 20%), including sudden death, shock, hypotension, syncope, or confusion[12]. The  
223 death case involved in this study were not confirmed to be PE by CT, the disease  
224 progression and hemodynamic changes during the rescue process were consistent with  
225 the contents of these literatures. So the cause of death was highly suspected to be PE.

226 As seen in the study, patients with coexisting hypertension, coronary heart disease, and  
227 diabetes are more likely to have chest symptoms. Therefore, when these patients with

228 chest symptoms, it is also crucial to distinguish them from PE. We should note that  
229 between 30% to 60% of patients with symptomatic proximal DVT have silent PE[13].  
230 About 40% of patients with symptomatic PE have proximal DVT and 25% have only  
231 distal DVT[14, 15]. However, only half of patients with PE and imaging confirmed  
232 LEDVT have leg symptoms[16, 17]. Two patients in this study had no leg symptoms  
233 and were admitted with chest tightness and/or chest pain as the first symptom. Coronary  
234 heart disease was diagnosed at the time of admission, and PE was confirmed only by  
235 further examination. Clinically, such patients are indeed easily confused with patients  
236 with coronary heart disease, and the differential diagnosis needs to be made quickly in  
237 a short time. The harm of PE is self-evident, so it is necessary to perform PE screening  
238 in patients with LEDVT if they are eligible.

239 The majority of patients in the study had coexisting diseases. There were eight patients  
240 in this study who were diagnosed with LEDVT at admission had neither leg nor chest  
241 symptoms. These patients were found to have LEDVT during the course of the  
242 examination for other diseases. And there were thirty-two patients been found to have  
243 LEDVT or PE during the diagnosis of other diseases inhospital. There was 15.3%  
244 prevalence of DVT in bedridden hospitalized orthopaedic patients[18]. Considering  
245 that some patients who require bedridden hospitalization would be potential LEDVT  
246 patients. Moreover, the majority of patients involved in this study with D-dimer testing  
247 were positive. Screening of these patients is indeed necessary.

248 Twenty-four of the patients in this study had tachycardia (pulse rate > 100 beats per  
249 minute) at admission, and since most of the study patients did not undergo CT. Thus,

250 only 7 patients with confirmed PE had a pulse rate  $\geq 100$  beats per minute. the

251 relationship between pulse rate with PE needs to be further explored.

252 More than half of the patients had blood glucose  $\geq 6.1$  mmol/L at admission. In addition

253 to patients with diabetes, some patients were admitted to the emergency room and were

254 in the non-fasting state when the index was detected.

255 Similar to other observational studies, this study further confirmed the results of some

256 previous studies, but it inevitably has some limitations. The study only looked at the

257 characteristics of patients diagnosed with central LEDVT at the time of admission, it

258 could not determine the relationship between these characteristics and LEDVT. Due to

259 the single-center study, small sample size and trivial data, it is not easy to systematize

260 and the degree of universality is not high. This study was conducted under natural

261 diagnosis and treatment conditions and is susceptible to interference by various

262 incidental factors, which may affect the accuracy and reliability of the study. This study

263 mainly observed the characteristics of patients with LEDVT at the time of admission,

264 and no further treatment of DVT has been recorded, which makes many attributes and

265 characteristics of the disease not revealed, thus exposing certain limitations.

266

## 267 **Conclusion**

268 LEDVT is more common in elderly patients aged  $\geq 65$  years. However, the incidence

269 of patients  $\geq 75$  years old observed in this study may be limited by the local economic

270 situation and life expectancy. The symptoms can present as many, may be the typical

271 leg symptoms, progression to PE may involve chest symptoms, or it may be neither leg



272 symptoms nor chest symptoms that are masked by the symptoms of other concomitant  
273 diseases. LEDVT can be complicated with multiple system/organ diseases. It is  
274 necessary to screen for LEDVT in patients with abnormal D-dimer.

275

## 276 **Author Contributions**

277 **Conceptualization:** Jianghao Pan, Jianming Sun, Le Wang.

278 **Data curation:** Le wang, Jianming Sun, Guangyin Fu, Yong Lei.

279 **Formal analysis:** Jianghao Pan, Le Wang.

280 **Project administration:** Jianghao Pan, Le Wang.

281 **Software:** Jiamin Song.

282 **Investigation:** Jianghao Pan, Jianming Sun.

283 **Writing – original draft:** Le Wang, Jianghao Pan.

284 **Writing – review & editing:** Le Wang, Jianghao Pan, Guangyin Fu, Yong Lei.

285

## 286 Reference

- 287 1. Khanbhai, M., et al., *The early management of DVT in the North West of England: A*  
288 *nation-wide problem?* Thromb Res, 2015. **136**(1): p. 76-86.
- 289 2. Rabinovich, A. and S.R. Kahn, *How I treat the postthrombotic syndrome.* Blood,  
290 2018. **131**(20): p. 2215-2222.
- 291 3. Raskob, G.E., et al., *Thrombosis: a major contributor to global disease burden.* Semin  
292 Thromb Hemost, 2014. **40**(7): p. 724-35.
- 293 4. Heit, J.A., *Epidemiology of venous thromboembolism.* Nat Rev Cardiol, 2015. **12**(8):

- 294 p. 464-74.
- 295 5. Tagalakis, V., et al., *Incidence of and mortality from venous thromboembolism in a*  
296 *real-world population: the Q-VTE Study Cohort*. Am J Med, 2013. **126**(9): p. 832 e13-  
297 21.
- 298 6. Siegal, D.M., et al., *Variations in incidence of venous thromboembolism in low-,*  
299 *middle-, and high-income countries*. Cardiovasc Res, 2021. **117**(2): p. 576-584.
- 300 7. Organization, W.H. *The global standard for diagnostic health information*  
301 *( International Classification of Diseases 11th Revision)*. 2018 [cited 2024; Available  
302 from: <https://icd.who.int/en>.
- 303 8. Rosendaal, F.R., *Thrombosis in the young: epidemiology and risk factors. A focus on*  
304 *venous thrombosis*. Thromb Haemost, 1997. **78**(1): p. 1-6.
- 305 9. White, R.H., *The epidemiology of venous thromboembolism*. Circulation, 2003.  
306 **107**(23 Suppl 1): p. I4-8.
- 307 10. Haeger, K., *Problems of acute deep venous thrombosis. I. The interpretation of signs*  
308 *and symptoms*. Angiology, 1969. **20**(4): p. 219-23.
- 309 11. Anand, S.S., et al., *Does this patient have deep vein thrombosis?* JAMA, 1998.  
310 **279**(14): p. 1094-9.
- 311 12. Douma, R.A., P.W. Kamphuisen, and H.R. Buller, *Acute pulmonary embolism. Part 1:*  
312 *epidemiology and diagnosis*. Nat Rev Cardiol, 2010. **7**(10): p. 585-96.
- 313 13. Stein, P.D., et al., *Silent pulmonary embolism in patients with deep venous*  
314 *thrombosis: a systematic review*. Am J Med, 2010. **123**(5): p. 426-31.
- 315 14. Le Gal, G., et al., *A positive compression ultrasonography of the lower extremity*

- 316            *veins is highly predictive of pulmonary embolism on computed tomography in*
- 317            *suspected patients*. *Thromb Haemost*, 2006. **95**(6): p. 963-6.
- 318    15.    Righini, M., et al., *Complete venous ultrasound in outpatients with suspected*
- 319            *pulmonary embolism*. *J Thromb Haemost*, 2009. **7**(3): p. 406-12.
- 320    16.    Da Costa Rodrigues, J., et al., *Diagnostic characteristics of lower extremity venous*
- 321            *compression ultrasonography in suspected pulmonary embolism: a meta-analysis*. *J*
- 322            *Thromb Haemost*, 2016. **14**(9): p. 1765-72.
- 323    17.    in *Venous thromboembolic diseases: diagnosis, management and thrombophilia*
- 324            *testing*. 2023: London. Available from: [Venous thromboembolic diseases: diagnosis,](#)
- 325            [management and thrombophilia testing - NCBI Bookshelf](#)
- 326    18.    Kumar, J., et al., *The prevalence of deep Venous thrombosis of the lower extremity in*
- 327            *hospitalised bedridden orthopaedic patients: a pilot study*. *J Pak Med Assoc*, 2023.
- 328            **73**(6): p. 1251-1254.
- 329

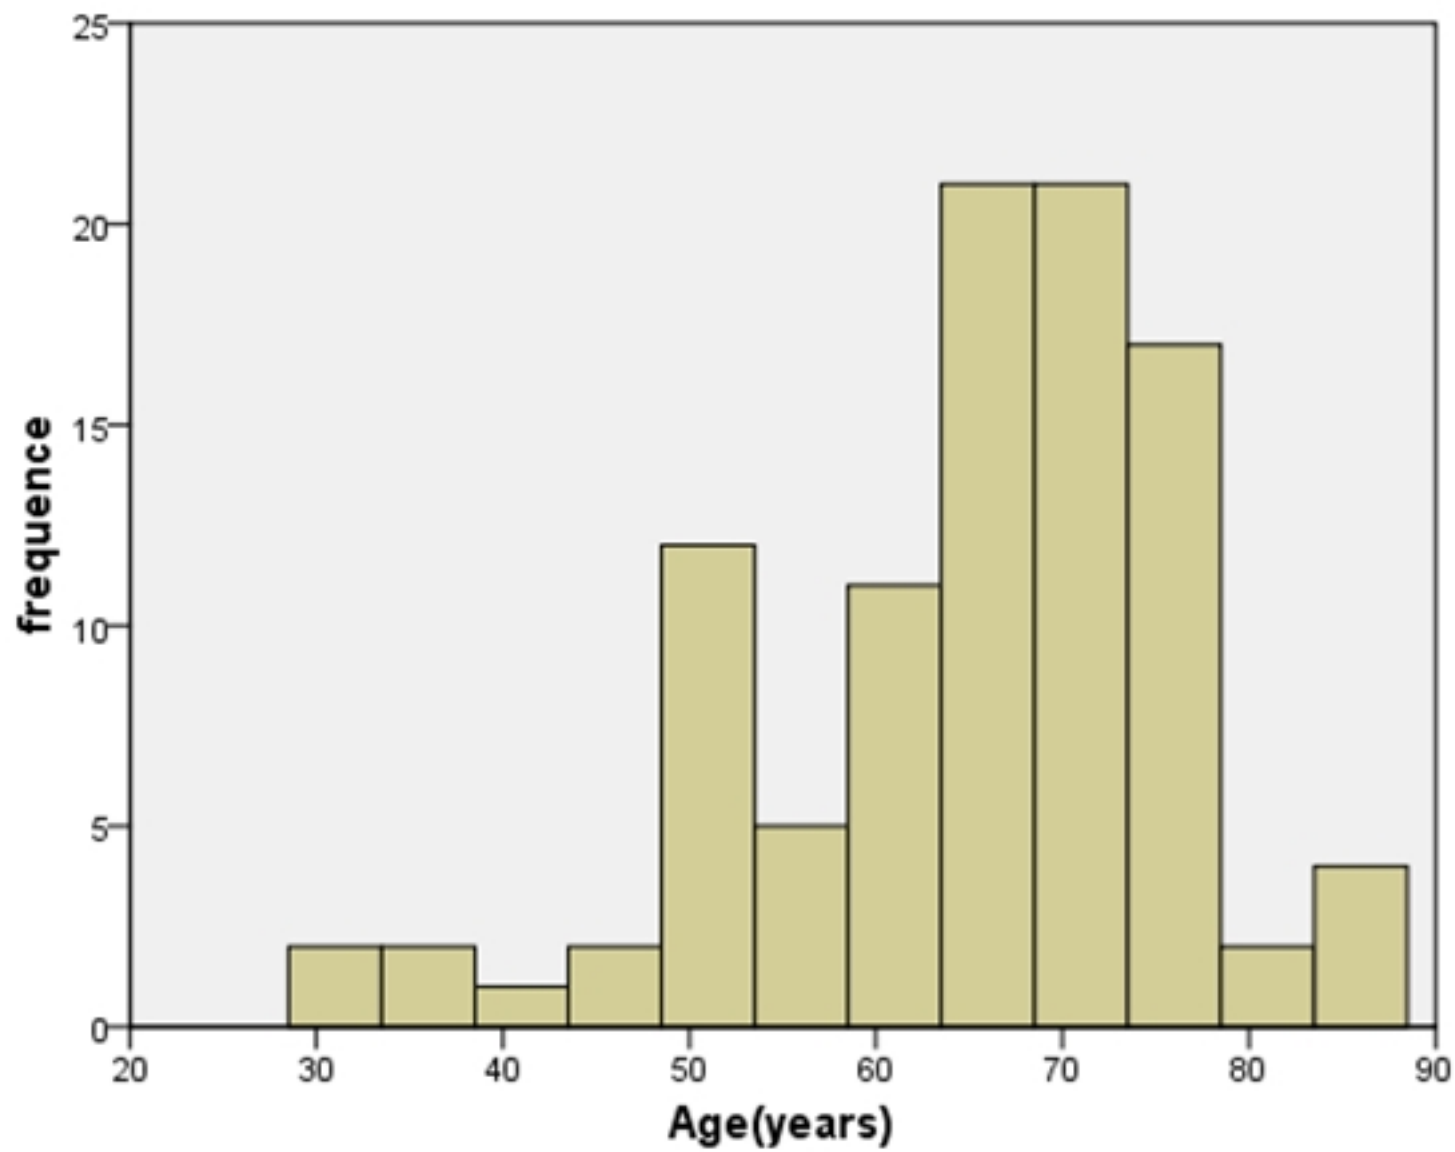

Figure
